# Supplementary material for: Treatment-Free Remission in Chronic Myeloid Leukemia Patients Treated With Low-Dose TKIs: A Feasible Option Also in the Real-Life. A Campus CML Study
Source: Front Oncol. 2022 Mar 3;12:839915. doi: 10.3389/fonc.2022.839915 (PMC8927081; doi:10.3389/fonc.2022.839915)
Supplement: Supplementary file 1 [file DataSheet_1.doc]

**CAMPUS CML SURVEY: LOW-DOSE TKIs AND TFR**

1) Do you follow CML patients treated with low-dose TKIs? **** YES **** NO

2) If YES, indicate the absolute number and percentage of patients on reduced dose therapy compared to the total number of patients for each TKI.

**** IMATINIB Number:___________ Percentage:_________%

**** NILOTINIB Number:___________ Percentage:_________%

**** DASATINIB Number:___________ Percentage:_________%

**** BOSUTINIB Number:___________ Percentage:_________%

**** PONATINIB Number:___________ Percentage:_________%

3) If YES, please provide the reason for reduced dosage:

**** IMATINIB

****Intolerance/Toxicity Number:___________ Percentage:_________%

****Comorbidities Number:___________ Percentage:_________%

**** MR achievement Number:___________ Percentage:_________%

****Other:_____________ Number:___________ Percentage:_________%

**** NILOTINIB

****Intolerance/Toxicity Number:___________ Percentage:_________%

****Comorbidities Number:___________ Percentage:_________%

**** MR achievement Number:___________ Percentage:_________%

****Other:_____________ Number:___________ Percentage:_________%

**** DASATINIB

****Intolerance/Toxicity Number:___________ Percentage:_________%

****Comorbidities Number:___________ Percentage:_________%

**** MR achievement Number:___________ Percentage:_________%

****Other:_____________ Number:___________ Percentage:_________%

**** BOSUTINIB

****Intolerance/Toxicity Number:___________ Percentage:_________%

****Comorbidities Number:___________ Percentage:_________%

**** MR achievement Number:___________ Percentage:_________%

****Other:_____________ Number:___________ Percentage:_________%

**** PONATINIB

****Intolerance/Toxicity Number:___________ Percentage:_________%

****Comorbidities Number:___________ Percentage:_________%

**** MR achievement Number:___________ Percentage:_________%

****Other:_____________ Number:___________ Percentage:_________%

4) Was the reduced dosage adopted from the start of treatment?

****YES, for the following reason(s):**____________________________**

****NO, the drug was started at the standard dosage and reduced only subsequently for the reasons indicated in point 3

5) In which line(s) of treatment did you usually prescribe low-dose TKIs?

****first line

****second line

****third or subsequent line

6) Do you think that TKIs dose reduction could jeopardize a possible subsequent attempt at TFR?

****YES

****NO

7) Did you refer patients treated with low-dose TKIs to TFR outside of clinical trials?

****YES

****NO

8) If YES, which was the low-dose TKI used prior to TFR?

**** IMATINIB Number:___________ Percentage:_________%

**** NILOTINIB Number:___________ Percentage:_________%

**** DASATINIB Number:___________ Percentage:_________%

**** BOSUTINIB Number:___________ Percentage:_________%

**** PONATINIB Number:___________ Percentage:_________%

9) If YES, how many TKIs had the patients taken before attempting at TFR?

**** 1 Number:___________ Percentage:_________%

**** 2 Number:___________ Percentage:_________%

**** 3 or more Number:___________ Percentage:_________%
